# Supplementary material
Source: PubMed Central journal article supplement (PMC6889069)
Supplement: NIHMS1542326-supplement-1.pdf [file NIHMS1542326-supplement-1.pdf]

## Sam68 impedes the recovery of arterial injury by augmenting inflammatory response

Shuling Han, MD, PhD<sup>1,\*</sup>, Shiyue Xu, MD, PhD<sup>2,\*</sup>, Junlan Zhou, MD, PhD<sup>1</sup>, Aijun Qiao, PhD<sup>2</sup>, Chan Boriboun, MS<sup>2</sup>, Wenxia Ma<sup>2</sup>, Huadong Li, MD, PhD<sup>2,8</sup>, Dauren Biyashev, PhD<sup>1</sup>, Liu Yang, MD, PhD<sup>2</sup>, Eric Zhang<sup>2</sup>, Qinghua Liu, MD, PhD<sup>3</sup>, Shayi Jiang, MD<sup>4</sup>, Ting C Zhao, MD, PhD<sup>5</sup>, Prasanna Krishnamurthy, PhD<sup>2</sup>, Chunxiang Zhang, MD, PhD<sup>2</sup>, Stéphane Richard, PhD<sup>6</sup>, Hongyu Qiu, MD, PhD<sup>7</sup>, Jianyi Zhang, MD, PhD<sup>2</sup>, Gangjian Qin, MD<sup>1,2,#</sup>

### Supplementary Information

#### Supplementary Figures

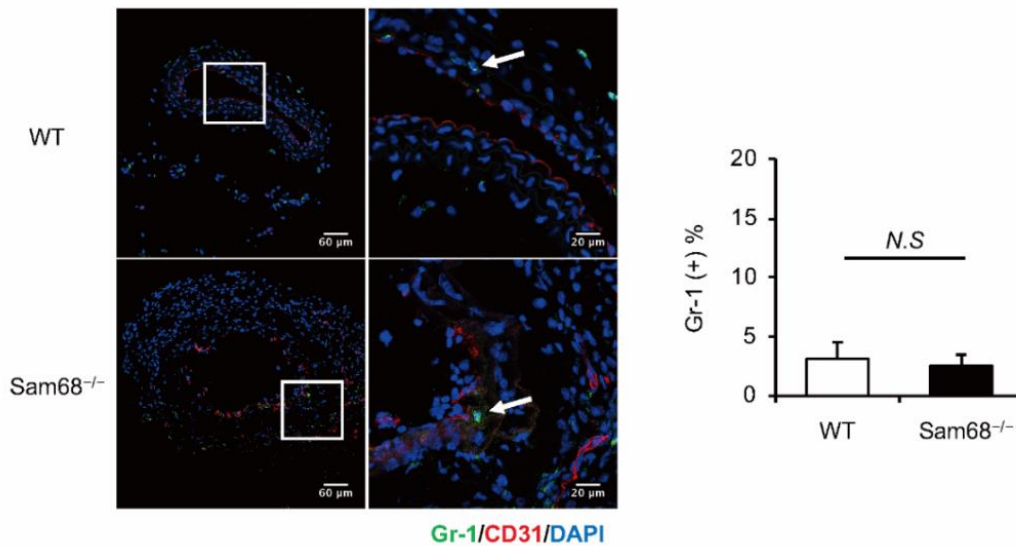

**Supplementary Figure I. Neutrophil infiltrations in the injured carotid arteries of WT and Sam68<sup>-/-</sup> mice are similar.** Carotid denudation injury was induced by wire in the left carotid arteries of WT and Sam68<sup>-/-</sup> mice. Three days later, injured vessels were isolated and analyzed histologically with immunofluorescent staining (*left panel.*), and the infiltrating Gr-1+ neutrophils were quantified and expressed as per 100 nuclei (*right panel.*) n=5 per group. N.S., not significant.

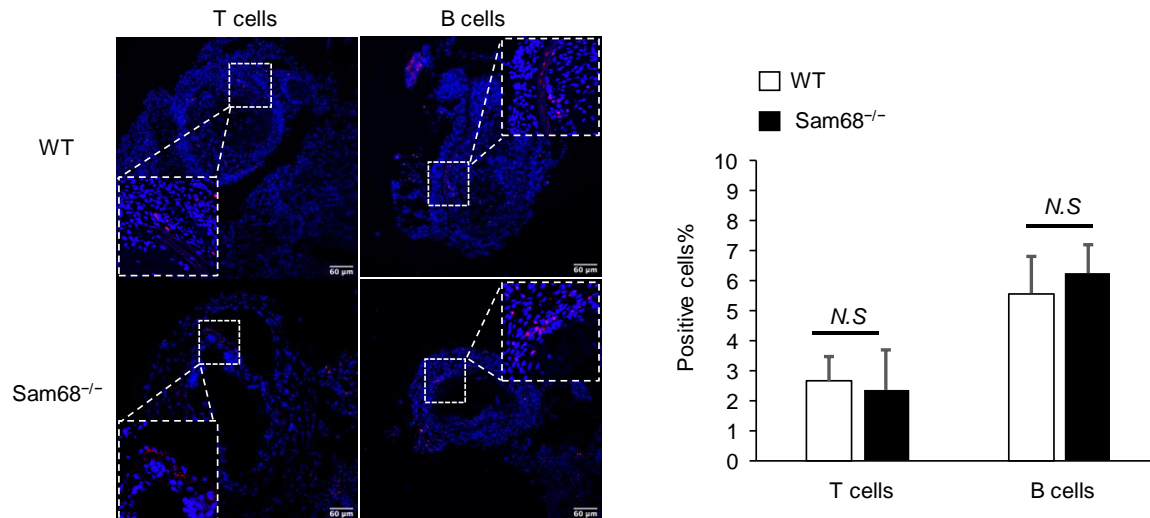

**Supplementary Figure II. T and B cell infiltrations in the injured carotid arteries are similar between of WT and Sam68<sup>-/-</sup> mice.** Carotid denudation injury was induced by wire in the left carotid arteries. Three days later, injured vessels were isolated and analyzed histologically with immunofluorescent staining for CD3 and B220 (*left panel*). The CD3+ T cells and B220+ B cells were quantified and expressed as per 100 nuclei (*right panel*). n=5 per group. N.S., not significant.

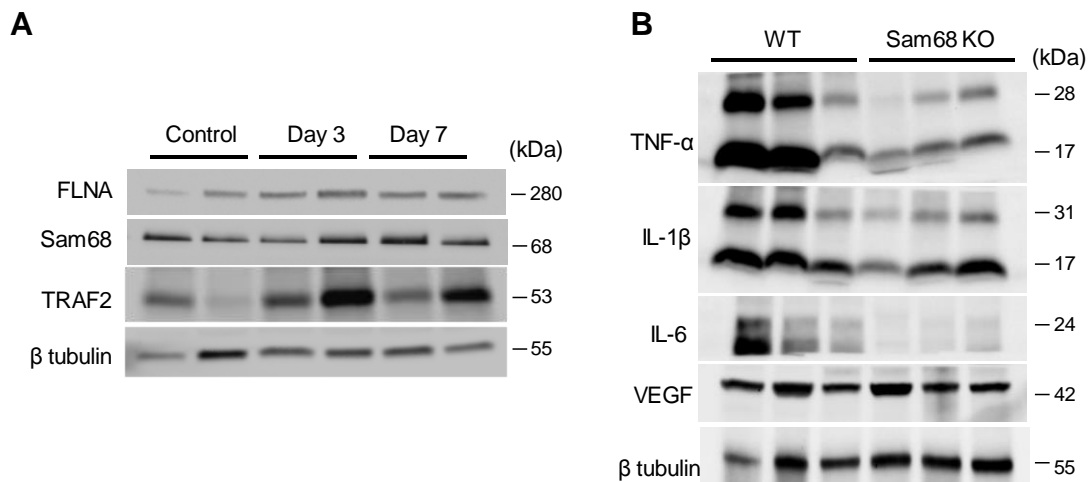

**Supplementary Figure III. Sam68 deficiency results in lowered levels of pro-inflammatory cytokine expression in the injured carotid arteries.** Carotid denudation injury was induced by wire in the left carotid artery of WT and Sam68<sup>-/-</sup> mice and at serial time points, the arterial tissues were isolated for Western blotting analyses of protein expression. **(A)** Endogenous Sam68, FLNA, and TRAF2 expression in control uninjured arteries and day 3 and day7 post-injury arteries in WT mice. **(B)** TNF- $\alpha$ , IL-1 $\beta$ , IL-6 and VEGF expression in day 3 post-injury carotid arteries from WT and Sam68<sup>-/-</sup> mice. n=3 per group.

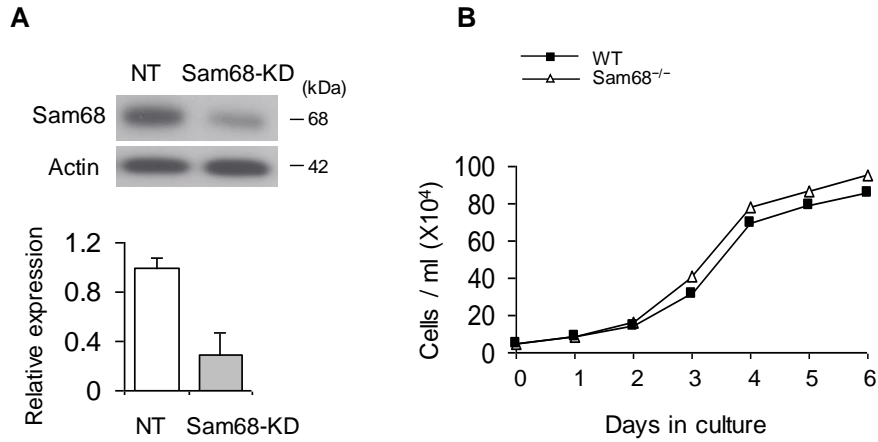

**Supplementary Figure IV. Knockdown of Sam68 does not affect endothelial cell growth *in vitro*.** MS1 cells were infected with lentiviral vectors coding for Sam68-shRNA or non-targeting (NT)-shRNA, and the transduced cells were selectively enriched in puromycin. **(A)** Representative and quantification of Sam68 protein expression as assessed by Western blotting. **(B)** MS1/Sam68-shRNA cells and MS1/NT-shRNA cells were cultured in DMEM medium supplemented with 10% FBS and 1%P/S. Cell counts were measured at a series of time points. Shown is the mean of Triplicate samples.

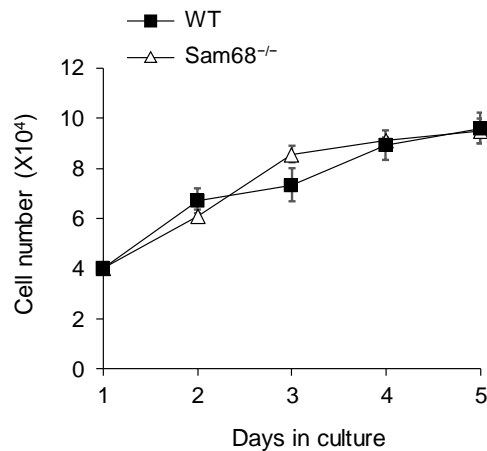

**Supplementary Figure V. Deletion of Sam68 does not affect vascular smooth muscle cell (VSMC) growth *in vitro*.** Primary VSMCs were isolated from WT and Sam68<sup>-/-</sup> mouse aorta and cultured in DMEM/F-12 medium supplemented with 10% FBS and 1%P/S. Cells at passage 4 were seeded at 4x10<sup>4</sup> cell/well of 96-well plate, and their proliferation were evaluated using MTT assay by following manufacturer's protocol. n=3 per group per time point.

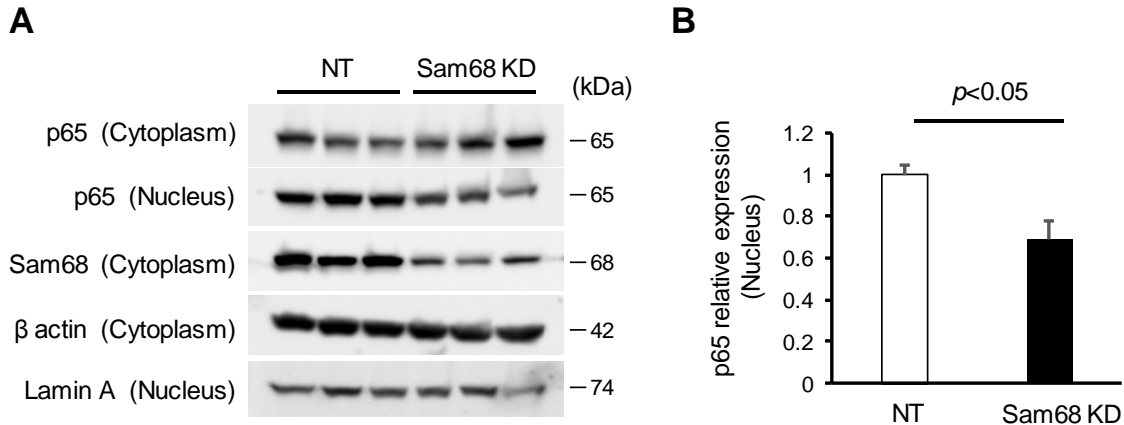

**Supplementary Figure VI. Sam68 knockdown in attenuates TNF-induced NF- $\kappa$ B nuclear translocation in macrophages.** (A) Representative Western blotting analysis of p65 in the nucleus and cytoplasm of Raw264.7/NT and Raw264.7/Sam68-KD cells following TNF- $\alpha$  treatment (10 ng/ml) for 30 min. (B) Nuclear p65 levels were quantified densitometrically, normalized to Lamin A, and expressed as fold difference in Sam68-KD vs. NT cells. n=3.

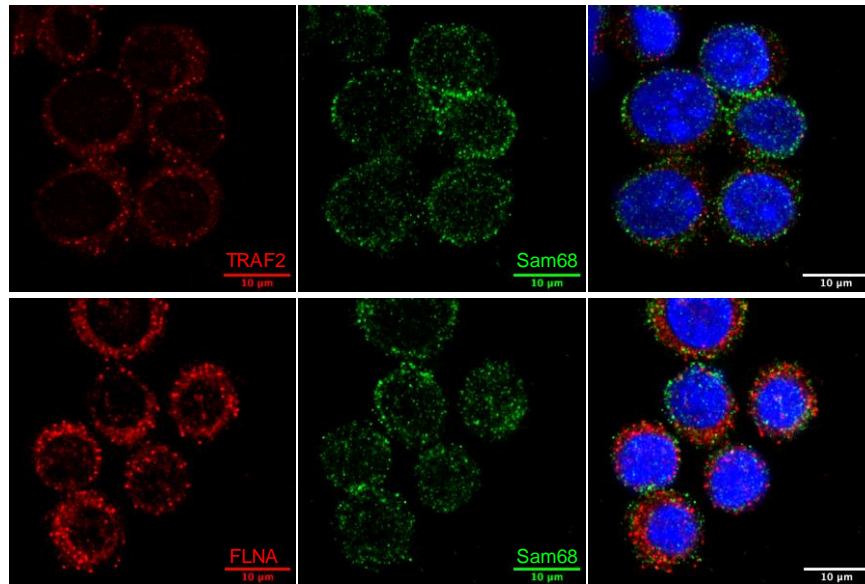

**Supplementary Figure VII. Immunohistochemical staining of Sam68, TRAF2, and FLNA in macrophage.** Raw264.7 cells were treated with TNF- $\alpha$  (10ng/mL) for 30 min, then fixed with 100% methanol for 5 min and blocked with 10% normal donkey serum in 0.1% PBS-Tween for 1 h. Next, the cells were incubated with anti-Sam68 antibody (abcam, ab76471, 1:1000 dilution) together with anti-Filamin A antibody (Millipore, MAB1678, 1:100 dilution) or with anti-TRAF2 antibody (Santa Cruz, sc-7346, 1:100 dilution) overnight at 4 $^{\circ}$ C, and stained with secondary antibody, donkey anti-rabbit Alexa Fluor 488 (Thermofisher, A-21206, 1:1000 dilution) or donkey anti-mouse Alexa Fluor 568 (Thermofisher, A10037, 1:1000 dilution) for 1 h at RT in dark. Lastly, the cells were incubated with DAPI for 10 min to allow for nuclear staining. The slides were examined under confocal microscope. Sam68, green; TRAF2 (red, upper panel); FLNA (red, lower panel).

## Supplementary Table

### Supplementary Table I: Primer sequences

| Experiment                               | Gene                           | Forward primer           | Reverse primer          |
|------------------------------------------|--------------------------------|--------------------------|-------------------------|
| Real-Time qRT-PCR<br>for Gene expression | <i>TNF-<math>\alpha</math></i> | AGGGATGAGAAGTTCCCAAATG   | GTGAGGGTCTGGGCCATA      |
|                                          | <i>IL-1<math>\beta</math></i>  | GCAACTGTTCTGAACTCAACT    | ATCTTTTGGGGTCCGTCACCT   |
|                                          | <i>IL-6</i>                    | TCGGAGGCTTAATTACACATGTTT | TGCCATTGCACAACCTCTTTTCT |
|                                          | <i>MCP-1</i>                   | CTGAAGACCTTAGGGCAGAT     | AAGGAATGGGTCCAGACATAC   |
|                                          | <i>VCAM1</i>                   | CCAAATCCACGCTTGTGTTGA    | GGAATGAGTAGACCTCCACCT   |
|                                          | <i>ICAM1</i>                   | TTCACACTGAATGCCAGCTC     | GTCTGCTGAGACCCCTCTTG    |
|                                          | <i>18S</i>                     | GTAACCCGTTGAACCCATT      | CCATCCAATCGGTAGTAGCG    |
| Genotyping                               | <i>Sam68</i>                   | GCCACTTCACATTGGCTAAAC    | ATGCCTGCTTGCCGAATA      |

### Supplementary Table II: Mass spectrometry identified proteins that interact with Sam68 upon TNF- $\alpha$ treatment in macrophages

| Accession | Description                                                                                | Coverage | Q3 | SM | Q4    | Coverage | Q4 | peptides | Q4 | PSM | Q4 | MW [kDa] |
|-----------|--------------------------------------------------------------------------------------------|----------|----|----|-------|----------|----|----------|----|-----|----|----------|
| P14131    | 40S ribosomal protein S16 OS=Mus musculus GN=Rps16 PE=2                                    | 15.07    | 2  | 4  | 20.55 | 3        | 12 | 16.4     |    |     |    |          |
| Q8CBA2    | Schlafen family member 5 OS=Mus musculus GN=Slfn5 PE=2 SV=1                                | 3.73     | 2  | 4  | 8.48  | 5        | 11 | 100.8    |    |     |    |          |
| Q8VI93    | 2'-5'-oligoadenylate synthase 3 OS=Mus musculus GN=Oas3 F                                  | 4.13     | 3  | 4  | 21.79 | 16       | 34 | 126.3    |    |     |    |          |
| Q3KQM4    | Splicing factor U2AF 65 kDa subunit OS=Mus musculus GN=U2                                  | 11.07    | 2  | 4  | 29.32 | 5        | 15 | 33.9     |    |     |    |          |
| B1ARA3    | 60S ribosomal protein L26 (Fragment) OS=Mus musculus GN=L26                                | 15.53    | 2  | 4  | 24.27 | 3        | 10 | 12.2     |    |     |    |          |
| B7FAV1    | Filamin, alpha (Fragment) OS=Mus musculus GN=Flna PE=4 SV=1                                | 11.90    | 3  | 4  | 13.90 | 20       | 38 | 274.5    |    |     |    |          |
| D6REF7    | Sphingosine-1-phosphate lyase 1 OS=Mus musculus GN=Sgpl1                                   | 5.34     | 2  | 4  | 22.18 | 6        | 10 | 54.7     |    |     |    |          |
| E9Q415    | Low affinity immunoglobulin gamma Fc region receptor II OS=Mus musculus GN=Larb1 PE=2 SV=1 | 10.58    | 2  | 4  | 10.58 | 2        | 5  | 35.0     |    |     |    |          |
| J3QNB1    | La-related protein 1 OS=Mus musculus GN=Larp1 PE=2 SV=1                                    | 4.38     | 3  | 4  | 8.96  | 7        | 18 | 121.0    |    |     |    |          |
| Q792Z1    | MCG140784 OS=Mus musculus GN=Try10 PE=2 SV=1 - [Q792                                       | 8.13     | 2  | 4  | 0.00  |          |    | 26.2     |    |     |    |          |
| Q8BQ46    | Protein Taf15 OS=Mus musculus GN=Taf15 PE=2 SV=1 - [Q8B                                    | 14.90    | 3  | 4  | 11.85 | 3        | 5  | 58.6     |    |     |    |          |

**Note:** Raw264.7 macrophages were treated with TNF- $\alpha$  (10 ng/mL) and vehicle for 7 min and lysed. The Sam68 co-immunoprecipitations were performed. The precipitated proteins were identified and analyzed by mass spectrometry.
